# Supplementary material for: Prognostic Discrimination of Alternative Lymph Node Classification Systems for Patients with Radically Resected Non-Metastatic Colorectal Cancer: A Cohort Study from a Single Tertiary Referral Center
Source: MDPI journal article supplement (doi:10.3390/cancers13153898), 2021-08-02
Supplement: s1 [file s1]

**Table S4.** OS depending on the respective LODDS classification. Each LODDS subgroup is defined by a LODDS range as indicated. \*The LODDS3 subgroup proposed by Ramacciato et al.<sup>36</sup> containing LODDS values between 0.012 and 0.026 was omitted as none of our included patients exhibited LODDS value within this range.

| LODDS Classification               | Subgroup | LODDS Range             | HR    | 95%CI        |
|------------------------------------|----------|-------------------------|-------|--------------|
| Percentiles                        | 1        | $\leq -3.611$           | 1     | (Reference)  |
|                                    | 2        | $> -3.611; \leq -3.219$ | 1.182 | 0.798-1.751  |
|                                    | 3        | $> -3.219; \leq -2.162$ | 1.679 | 1.124-2.507  |
|                                    | 4        | $> -2.162$              | 2.693 | 1.861-3.898  |
| Amini et al. <sup>40</sup>         | 1        | $\leq -3$               | 1     | (Reference)  |
|                                    | 2        | $> -3; < 0$             | 1.839 | 1.400-2.415  |
|                                    | 3        | $\geq 0$                | 5.812 | 3.502-9.645  |
| Bagante et al. <sup>23</sup>       | 1        | $< -2$                  | 1     | (Reference)  |
|                                    | 2        | $-1.99; -0.90$          | 1.888 | 1.342-2.658  |
|                                    | 3        | $-0.89; 1.50$           | 2.898 | 1.954-4.299  |
|                                    | 4        | $> 1.5$                 | 4.605 | 1.973-10.745 |
| Calero et al. <sup>20</sup>        | 1        | $\leq -3$               | 1     | (Reference)  |
|                                    | 2        | $> -3; \leq -1$         | 1.723 | 1.300-2.291  |
|                                    | 3        | $> -1; \leq 3$          | 3.614 | 2.461-5.307  |
|                                    | 4        | $> 3$                   | 3.735 | 0.894-15.612 |
| Cao et al. <sup>32</sup>           | 1        | $\leq -0.5$             | 1     | (Reference)  |
|                                    | 2        | $> -0.5; \leq 0$        | 1.238 | 0.630-2.428  |
|                                    | 3        | $> 0; \leq 0.5$         | 6.353 | 2.930-13.777 |
|                                    | 4        | $> 0.5$                 | 4.350 | 2.280-8.297  |
| Cao et al. <sup>39</sup>           | 1        | $\leq -2.6$             | 1     | (Reference)  |
|                                    | 2        | $> -2.6; \leq -1.6$     | 1.529 | 1.110-2.107  |
|                                    | 3        | $> -1.6; \leq -0.5$     | 2.379 | 1.625-3.483  |
|                                    | 4        | $> -0.5$                | 3.164 | 2.052-4.878  |
| Chang et al. <sup>27</sup>         | 1        | $\leq -0.92$            | 1     | (Reference)  |
|                                    | 2        | $-0.91; -0.62$          | 6.530 | 3.032-14.061 |
|                                    | 3        | $-0.61; -0.26$          | 1.633 | 0.761-3.505  |
|                                    | 4        | $> -0.26$               | 2.693 | 1.723-4.210  |
| Conci et al. <sup>18</sup>         | 1        | $\leq -1.35$            | 1     | (Reference)  |
|                                    | 2        | $> -1.35; \leq -1$      | 1.517 | 0.795-2.892  |
|                                    | 3        | $> -1; \leq -0.25$      | 3.092 | 1.864-5.127  |
|                                    | 4        | $> -0.25$               | 2.783 | 1.778-4.359  |
| Fang et al. <sup>16</sup>          | 1        | $< -0.82$               | 1     | (Reference)  |
|                                    | 2        | $\geq -0.82; < -0.57$   | 5.594 | 2.697-11.604 |
|                                    | 3        | $\geq -0.57$            | 2.418 | 1.624-3.599  |
| Fortea-Sanchis et al. <sup>2</sup> | 1        | $< -2$                  | 1     | (Reference)  |

|                                  |   |                        |       |              |
|----------------------------------|---|------------------------|-------|--------------|
|                                  | 2 | $\geq -2; \leq -1$     | 1.753 | 1.235-2.487  |
|                                  | 3 | $> -1$                 | 3.211 | 2.240-4.605  |
| He et al. <sup>35</sup>          | 1 | $< -3$                 | 1     | (Reference)  |
|                                  | 2 | $\geq -3; < -2$        | 1.554 | 1.114-2.167  |
|                                  | 3 | $\geq -2; < -1$        | 2.046 | 1.413-2.963  |
|                                  | 4 | $\geq -1; < 0$         | 2.694 | 1.655-4.386  |
|                                  | 5 | $\geq 0$               | 5.896 | 3.550-9.792  |
| Huang et al. <sup>19</sup>       | 1 | $< -1$                 | 1     | (Reference)  |
|                                  | 2 | $\geq -1.00; < 0$      | 2.087 | 1.310-3.325  |
|                                  | 3 | $\geq 0; < 1$          | 4.640 | 2.542-8.470  |
|                                  | 4 | $\geq 1.00; < 2$       | 5.930 | 2.089-16.831 |
|                                  | 5 | $\geq 2$               | 3.389 | 1.225-9.377  |
| Jian-Hui et al. <sup>24</sup>    | 1 | $\leq -1.5$            | 1     | (Reference)  |
|                                  | 2 | $> -1.5; \leq -1$      | 1.739 | 1.082-2.796  |
|                                  | 3 | $> -1; \leq 0$         | 2.237 | 1.429-3.501  |
|                                  | 4 | $> 0$                  | 5.751 | 3.399-9.733  |
| Lee et al. <sup>21</sup>         | 1 | $\leq -4$              | 1     | (Reference)  |
|                                  | 2 | $> -4; \leq -2.5$      | 1.809 | 1.045-3.132  |
|                                  | 3 | $> -2.5; \leq -2$      | 2.039 | 1.093-3.806  |
|                                  | 4 | $> -2; \leq -0.5$      | 3.511 | 1.965-6.274  |
|                                  | 5 | $> -0.5$               | 4.952 | 2.612-9.388  |
| Persiani et al. <sup>43</sup>    | 1 | $\leq -1.36$           | 1     | (Reference)  |
|                                  | 2 | $-1.35; -0.53$         | 2.620 | 1.691-4.060  |
|                                  | 3 | $\geq -0.52$           | 2.452 | 1.633-3.681  |
| Ramacciato et al. <sup>36*</sup> | 1 | $< -0.005$             | 1     | (Reference)  |
|                                  | 2 | $\geq -0.005; < 0.012$ | 1.894 | 0.459-7.812  |
|                                  | 4 | $\geq 0.026$           | 4.955 | 2.955-8.309  |
| Riediger et al. <sup>15</sup>    | 1 | $< -1$                 | 1     | (Reference)  |
|                                  | 2 | $-1; -0.500$           | 3.588 | 2.023-6.365  |
|                                  | 3 | $-0.499; -0.001$       | 1.168 | 0.545-2.501  |
|                                  | 4 | $\geq 0$               | 4.513 | 2.778-7.334  |
|                                  | 5 | $> -0.5$               | 4.952 | 2.612-9.388  |
| Song et al. <sup>28</sup>        | 1 | $\leq -2.51$           | 1     | (Reference)  |
|                                  | 2 | $> -2.51; \leq -1.68$  | 1.395 | 0.983-1.979  |
|                                  | 3 | $> -1.68; \leq -0.51$  | 2.240 | 1.559-3.221  |
|                                  | 4 | $> -0.51; \leq 0.73$   | 2.678 | 1.637-4.383  |
|                                  | 5 | $> 0.73$               | 4.722 | 2.231-9.997  |
| Sun et al. <sup>10</sup>         | 1 | $\leq -1.5$            | 1     | (Reference)  |
|                                  | 2 | $-1.49; -1.000$        | 1.754 | 1.091-2.820  |
|                                  | 3 | $-0.999; -0.500$       | 4.056 | 2.275-7.230  |
|                                  | 4 | $-0.499; 0$            | 1.352 | 0.687-2.659  |
|                                  | 5 | $> 0$                  | 5.846 | 3.453-9.898  |
| Toth et al. <sup>37</sup>        | 1 | $< -1.125$             | 1     | (Reference)  |
|                                  | 2 | $-1.125; -0.251$       | 2.539 | 1.586-4.065  |
|                                  | 3 | $-0.250; 0.749$        | 2.101 | 1.224-3.606  |
|                                  | 4 | $\geq 0.750$           | 3.800 | 1.818-7.945  |

|                           |   |                  |       |              |
|---------------------------|---|------------------|-------|--------------|
| Wang et al. <sup>33</sup> | 1 | < -2.2           | 1     | (Reference)  |
|                           | 2 | -2.2; < -1.1     | 1.660 | 1.199-2.299  |
|                           | 3 | -1.1; < 0        | 2.207 | 1.410-3.454  |
|                           | 4 | 0; < 1.1         | 5.258 | 2.8596-9.668 |
|                           | 5 | ≥ 1.1            | 5.082 | 2.396-10.777 |
| Wang et al. <sup>42</sup> | 1 | ≤ -2.5           | 1     | (Reference)  |
|                           | 2 | > -2.5; ≤ -1     | 1.539 | 1.144-2.070  |
|                           | 3 | > -1; ≤ 0.9      | 3.141 | 2.113-4.670  |
|                           | 4 | > 0.9            | 4.608 | 2.178-9.749  |
| Wu et al. <sup>41</sup>   | 1 | ≤ -1.46          | 1     | (Reference)  |
|                           | 2 | - 1.45; -1.17    | 2.114 | 1.185-3.772  |
|                           | 3 | -1.16; - 0.73    | 3.819 | 2.136-6.827  |
|                           | 4 | ≥ -0.72          | 2.531 | 1.709-3.748  |
| Xu et al. <sup>12</sup>   | 1 | ≤ -2.8           | 1     | (Reference)  |
|                           | 2 | > -2.8; ≤ -1.60  | 1.493 | 1.087-2.050  |
|                           | 3 | > -1.60; ≤ -0.31 | 2.376 | 1.637-3.449  |
|                           | 4 | > -0.31          | 3.361 | 2.129-5.307  |
| Xu et al. <sup>38</sup>   | 1 | < -1             | 1     | (Reference)  |
|                           | 2 | -1.000; -0.501   | 3.594 | 2.025-6.379  |
|                           | 3 | -0.500; -0.001   | 1.169 | 0.546-2.503  |
|                           | 4 | 0; 0.499         | 4.358 | 2.204-8.617  |
|                           | 5 | ≥ 0.500          | 4.662 | 2.440-8.908  |
| Yang et al. <sup>34</sup> | 1 | ≤ -1.43          | 1     | (Reference)  |
|                           | 2 | > -1.43; ≤ -1.20 | 2.164 | 1.126-4.159  |
|                           | 3 | > -1.20; ≤ -0.69 | 2.966 | 1.696-5.188  |
|                           | 4 | > -0.69          | 2.515 | 1.699-3.724  |
| Zhou et al. <sup>14</sup> | 1 | ≤ -1             | 1     | (Reference)  |
|                           | 2 | -0.999; -0.500   | 3.737 | 2.104-6.637  |
|                           | 3 | -0.499; 0.500    | 1.996 | 1.191-3.346  |
|                           | 4 | > 0.500          | 4.638 | 2.428-8.862  |
