# Supplementary material for: Prognostic Discrimination of Alternative Lymph Node Classification Systems for Patients with Radically Resected Non-Metastatic Colorectal Cancer: A Cohort Study from a Single Tertiary Referral Center
Source: MDPI journal article supplement (doi:10.3390/cancers13153898), 2021-08-02
Supplement: s1 [file s1]

**Table S1.** ROC analysis of various LN classification systems for 1- year, 3-year and 5-year OS.

| Overall Survival (OS) | LN evaluation Type | ROC analysis |               |         |
|-----------------------|--------------------|--------------|---------------|---------|
|                       |                    | AUC          | 95% CI        | p-value |
| <b>1-year OS</b>      | LODDS              | 0.634        | 0.567 – 0.701 | < 0.001 |
|                       | LNR                | 0.591        | 0.516 – 0.666 | 0.013   |
|                       | tLN                | 0.421        | 0.356 – 0.486 | 0.030   |
|                       | pLN                | 0.583        | 0.509 – 0.657 | 0.023   |
| <b>3-year OS</b>      | LODDS              | 0.658        | 0.606 – 0.710 | < 0.001 |
|                       | LNR                | 0.640        | 0.586 – 0.695 | < 0.001 |
|                       | tLN                | 0.472        | 0.420 – 0.525 | 0.311   |
|                       | pLN                | 0.632        | 0.578 – 0.686 | < 0.001 |
| <b>5-year OS</b>      | LODDS              | 0.660        | 0.609 – 0.711 | < 0.001 |
|                       | LNR                | 0.653        | 0.602 – 0.704 | < 0.001 |
|                       | tLN                | 0.502        | 0.449 – 0.556 | 0.933   |
|                       | pLN                | 0.648        | 0.597 – 0.699 | < 0.001 |
