# Supplementary material for: Prognostic Discrimination of Alternative Lymph Node Classification Systems for Patients with Radically Resected Non-Metastatic Colorectal Cancer: A Cohort Study from a Single Tertiary Referral Center
Source: MDPI journal article supplement (doi:10.3390/cancers13153898), 2021-08-02
Supplement: s1 [file s1]

**Table S2.** OS depending on the N category defined by the AJCC/UICC

| <b>N Classification<br/>AJCC/UICC 8<sup>th</sup> edition</b> | <b>Positive Lymph Nodes</b> | <b>HR</b> | <b>95%CI</b> |
|--------------------------------------------------------------|-----------------------------|-----------|--------------|
| 0                                                            | 0                           | 1         | (Reference)  |
| 1                                                            | 1-3                         | 1.634     | 1.206-2.214  |
| 2                                                            | ≥4                          | 2.675     | 1.899-3.768  |
