# Supplementary material for: Prognostic Discrimination of Alternative Lymph Node Classification Systems for Patients with Radically Resected Non-Metastatic Colorectal Cancer: A Cohort Study from a Single Tertiary Referral Center
Source: MDPI journal article supplement (doi:10.3390/cancers13153898), 2021-08-02
Supplement: s1 [file s1]

**Table S3.** OS depending on the respective LNR classification. Each LNR subgroup is defined by a LNR range as indicated.

| <b>LNR Classification</b>         | <b>Subgroup</b> | <b>LNR Range</b> | <b>HR</b> | <b>95% CI</b> |
|-----------------------------------|-----------------|------------------|-----------|---------------|
| Agnes et al. <sup>30</sup>        | 1               | 0                | 1         | (Reference)   |
|                                   | 2               | 0.01; 0.10       | 1.438     | 1.013-2.041   |
|                                   | 3               | 0.11; 0.25       | 1.979     | 1.361-2.876   |
|                                   | 4               | 0.26; 0.40       | 3.832     | 2.171-6.762   |
|                                   | 5               | > 0.40           | 3.153     | 2.008-4.951   |
| Arslan et al. <sup>11</sup>       | 1               | ≤ 0.05           | 1         | (Reference)   |
|                                   | 2               | >0.05-0.2        | 1.523     | 1.117-2.076   |
|                                   | 3               | > 0.20           | 2.957     | 2.080-4.204   |
| Bagante et al. <sup>23</sup>      | 1               | 0                | 1         | (Reference)   |
|                                   | 2               | 0.01; 0.25       | 1.671     | 1.250-2.235   |
|                                   | 3               | 0.26; 0.5        | 2.415     | 1.506-3.872   |
|                                   | 4               | > 0.5            | 6.794     | 3.949-11.688  |
| Calero et al. <sup>20</sup>       | 1               | 0                | 1         | (Reference)   |
|                                   | 2               | 0.01; 0.25       | 1.656     | 1.238-2.215   |
|                                   | 3               | 0.26; 0.75       | 3.076     | 2.049-4.617   |
|                                   | 4               | >0.75            | 5.526     | 2.584-11.817  |
| Cao et al. <sup>32</sup>          | 1               | 0; 0.24          | 1         | (Reference)   |
|                                   | 2               | 0.25; 0.28       | 1.658     | 1.243-2.213   |
|                                   | 3               | >0.28            | 3.368     | 2.290-4.953   |
| Chang et al. <sup>27</sup>        | 1               | ≤ 0.08           | 1         | (Reference)   |
|                                   | 2               | 0.09; 0.17       | 1.479     | 0.984-2.224   |
|                                   | 3               | 0.18; 0.33       | 2.961     | 1.909-4.592   |
|                                   | 4               | > 0.33           | 2.699     | 1.796-4.055   |
| Conci et al. <sup>18</sup>        | 1               | 0                | 1         | (Reference)   |
|                                   | 2               | >0; ≤0.25        | 1.642     | 1.228-2.195   |
|                                   | 3               | >0.25            | 3.340     | 2.289-4.873   |
| Fang et al. <sup>16</sup>         | 1               | < 0.1            | 1         | (Reference)   |
|                                   | 2               | 0.1; 0.33        | 2.034     | 1.464-2.827   |
|                                   | 3               | ≥ 0.34           | 2.717     | 1.809-4.082   |
| Forte-Sanchis et al. <sup>2</sup> | 1               | 0; 0.24          | 1         | (Reference)   |
|                                   | 2               | 0.25; 0.60       | 2.466     | 1.679-3.623   |
|                                   | 3               | > 0.60           | 4.635     | 2.424-8.860   |
| Huang et al. <sup>19</sup>        | 1               | < 0.25           | 1         | (Reference)   |
|                                   | 2               | ≥0.25; <0.5      | 2.078     | 1.330-3.251   |
|                                   | 3               | ≥0.50; <0.75     | 4.648     | 2.546-8.486   |
|                                   | 4               | ≥0.75            | 4.330     | 2.061-9.097   |
| Jian-Hui et al. <sup>24</sup>     | 1               | 0                | 1         | (Reference)   |
|                                   | 2               | 0.01; ≤ 0.1      | 1.436     | 1.011-2.039   |
|                                   | 3               | > 0.1; ≤ 0.25    | 1.980     | 1.363-2.878   |
|                                   | 4               | > 0.25           | 3.374     | 2.311-4.926   |

|                                |   |               |       |              |
|--------------------------------|---|---------------|-------|--------------|
| La Torre et al. <sup>29</sup>  | 1 | 0             | 1     | (Reference)  |
|                                | 2 | 0.010; 0.199  | 1.593 | 1.184-2.143  |
|                                | 3 | 0.200; 0.399  | 3.225 | 1.970-5.280  |
|                                | 4 | > 0.399       | 3.251 | 2.083-5.072  |
| Lee et al. <sup>21</sup>       | 1 | ≤ 0.1         | 1     | (Reference)  |
|                                | 2 | >0.1; ≤ 0.2   | 1.746 | 1.189-2.565  |
|                                | 3 | >0.2; ≤ 0.3   | 2.665 | 1.459-4.868  |
|                                | 4 | >0.3          | 2.893 | 1.970-4.250  |
| Liu et al. <sup>26</sup>       | 1 | 0             | 1     | (Reference)  |
|                                | 2 | 0.01; 0.10    | 1.437 | 1.012-2.040  |
|                                | 3 | 0.11; 0.40    | 2.264 | 1.613-3.178  |
|                                | 4 | > 0.40        | 3.183 | 2.026-4.999  |
| Malleo et al. <sup>13</sup>    | 1 | 0             | 1     | (Reference)  |
|                                | 2 | >0; ≤0.2      | 1.607 | 1.194-2.162  |
|                                | 3 | >0.2; 0.4     | 3.082 | 1.903-4.991  |
|                                | 4 | >0.4          | 3.115 | 7.985-4.890  |
| Negi et al. <sup>22</sup>      | 1 | 0             | 1     | (Reference)  |
|                                | 2 | > 0; ≤ 0.5    | 1.782 | 1.354-2.345  |
|                                | 3 | > 0.5         | 6.789 | 3.948-11.675 |
| Riediger et al. <sup>15</sup>  | 1 | < 0.1         | 1     | (Reference)  |
|                                | 2 | 0.1; 0.199    | 1.742 | 1.180-2.574  |
|                                | 3 | ≥ 0.2         | 2.765 | 1.976-3.869  |
| Rosenberg et al. <sup>31</sup> | 1 | 0             | 1     | (Reference)  |
|                                | 2 | 0.01; 0.17    | 1.543 | 1.137-2.094  |
|                                | 3 | 0.18; 0.41    | 3.026 | 1.982-4.618  |
|                                | 4 | 0.42; 0.69    | 2.851 | 1.673-4.858  |
|                                | 5 | ≥0.70         | 4.938 | 2.323-10.496 |
| Smith et al. <sup>25</sup>     | 1 | 0             | 1     | (Reference)  |
|                                | 2 | >0; ≤ 1/15    | 1.545 | 1.044-2.286  |
|                                | 3 | >1/15; ≤ 3/10 | 1.843 | 1.323-2.569  |
|                                | 4 | >3/10; ≤ 7/10 | 2.908 | 1.881-4.496  |
|                                | 5 | > 7/10        | 4.913 | 2.312-10.441 |
| Song et al. <sup>28</sup>      | 1 | 0             | 1     | (Reference)  |
|                                | 2 | 0.01; 0.11    | 1.482 | 1.051-2.088  |
|                                | 3 | 0.12; 0.36    | 2.330 | 1.635-3.320  |
|                                | 4 | 0.37; 0.66    | 2.453 | 1.500-4.013  |
|                                | 5 | > 0.66        | 5.410 | 2.640-11.087 |
| Sun et al. <sup>10</sup>       | 1 | 0             | 1     | (Reference)  |
|                                | 2 | 0.01; 0.2     | 1.635 | 1.215-2.201  |
|                                | 3 | 0.21; 0.5     | 2.375 | 1.557-3.623  |
|                                | 4 | > 0.5         | 6.814 | 3.960-11.726 |
| Wang et al. <sup>17</sup>      | 1 | 0             | 1     | (Reference)  |
|                                | 2 | 0.01; 0.30    | 1.728 | 1.298-2.301  |
|                                | 3 | 0.31; 0.60    | 2.658 | 1.685-4.193  |
|                                | 4 | 0.61; 1       | 5.913 | 3.039-11.507 |

|                           |   |                  |       |             |
|---------------------------|---|------------------|-------|-------------|
| Wang et al. <sup>33</sup> | 1 | < 0.07           | 1     | (Reference) |
|                           | 2 | 0.07; < 0,25     | 1.483 | 1.078-2.041 |
|                           | 3 | 0.25; < 0,50     | 2.327 | 1.471-3.681 |
|                           | 4 | 0.50; 1          | 5.103 | 3.103-8.392 |
| Xu et al. <sup>12</sup>   | 1 | 0                | 1     | (Reference) |
|                           | 2 | >0; ≤ 0.125      | 1.501 | 1.073-2.101 |
|                           | 3 | > 0.125; ≤ 0.425 | 2.219 | 1.564-3.148 |
|                           | 4 | > 0.425; ≤ 1     | 3.366 | 2.131-5.316 |
| Zhou et al. <sup>8</sup>  | 1 | 0; ≤0.30         | 1     | (Reference) |
|                           | 2 | >0.3; ≤0.7       | 2.309 | 1.526-3.496 |
|                           | 3 | >0.7; ≤1         | 3.674 | 1.759-7.673 |
